# Supplementary material
Source: publisher figshare collection journal article supplement (https://acs.figshare.com/ndownloader/files/10294944)
Supplement: Supplementary file 1 [file 10294944]

# Supporting Information

## Highly Stable Hybrid Capacitive Deionization with a MnO<sub>2</sub> Anode and a Positively Charged Cathode

Tingting Wu,<sup>†</sup> Gang Wang,<sup>\*†</sup> Shiyong Wang,<sup>†</sup> Fei Zhan,<sup>†</sup> Yu Fu,<sup>†</sup> Huiying Qiao,<sup>†</sup> Jieshan

Qiu<sup>\*†,‡</sup>

<sup>†</sup> *State Key Lab of Fine Chemicals, School of Chemical Engineering, Liaoning Key Lab for*

*Energy Materials and Chemical Engineering, Dalian University of Technology, Dalian*

*116024, Liaoning, China*

<sup>‡</sup> *School of Chemical Engineering and Technology, Xi'an Jiaotong University, Xi'an 710049,*

*China*

Corresponding Authors:

Gang Wang, \*E-mail: [wghy1979@163.com](mailto:wghy1979@163.com);

Jieshan Qiu, \*E-mail: [jqiu@dlut.edu.cn](mailto:jqiu@dlut.edu.cn), \*Tel/Fax: +86-411-84986024

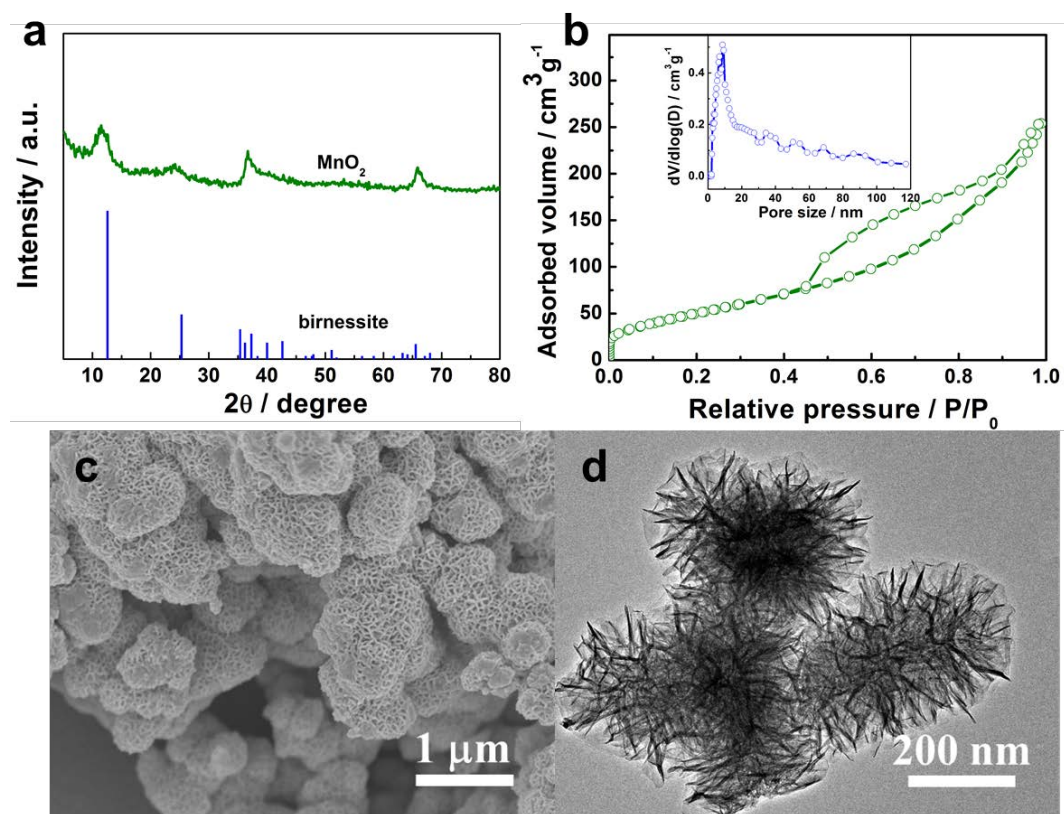

**Figure S1.** (a) The XRD pattern, (b) nitrogen adsorption-desorption curve, (c) FESEM image and (d) TEM image of the synthesized  $\text{MnO}_2$ .

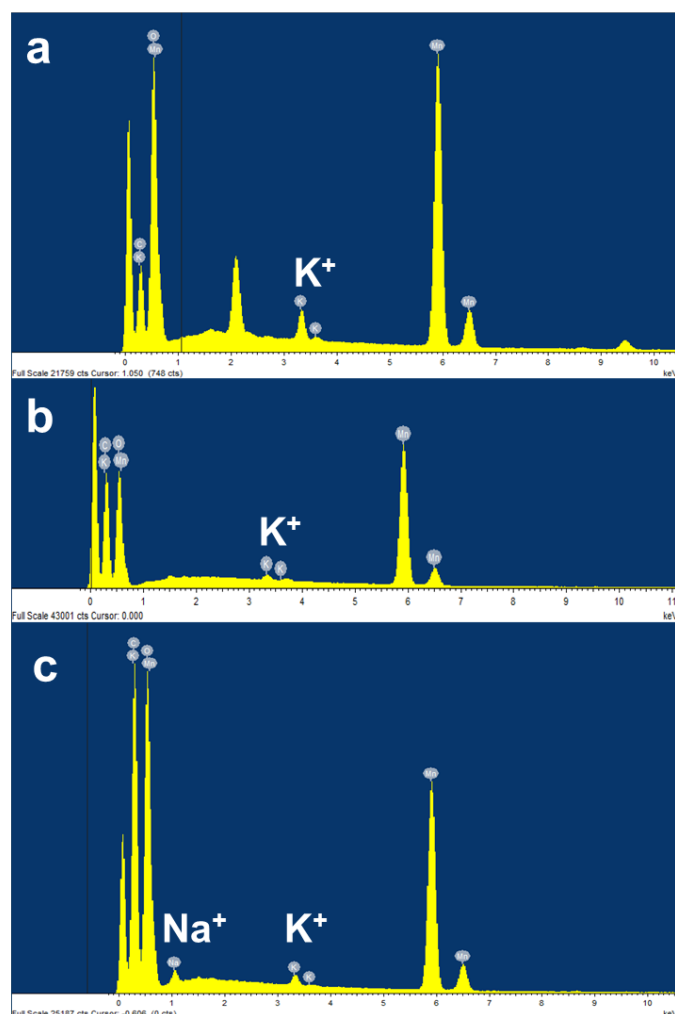

**Figure S2.** EDS spectra of the MnO<sub>2</sub> electrode: (a) before the CDI test, (b) after the charging process and (c) after the discharging process.

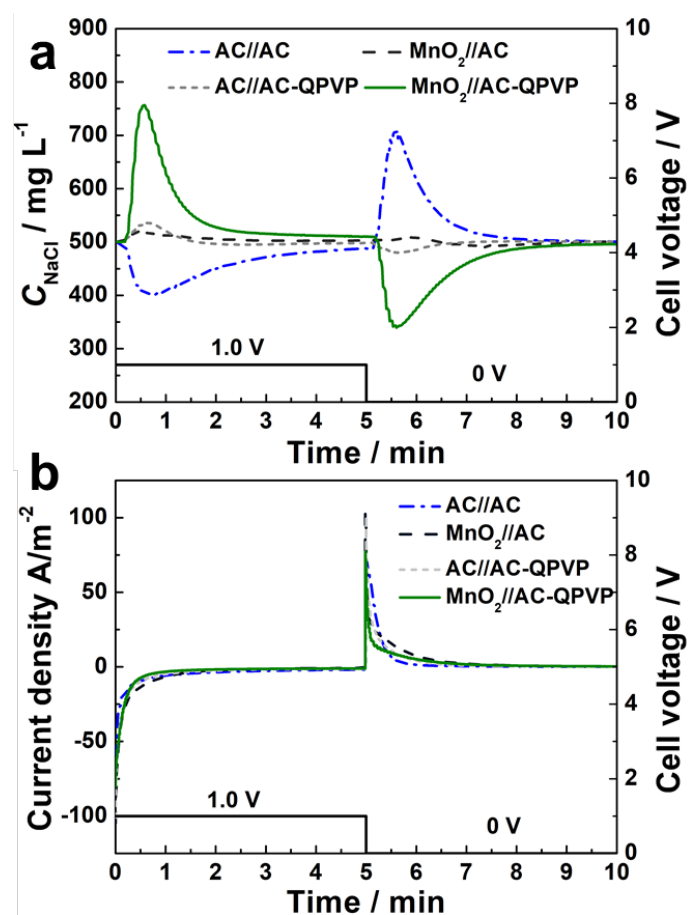

**Figure S3.** (a) Effluent NaCl concentration profiles and (b) current density of AC//AC, MnO<sub>2</sub>//AC, AC//AC-QPVP and MnO<sub>2</sub>//AC-QPVP at the cell voltage of 1.0/0 V in 500 mg/L NaCl.

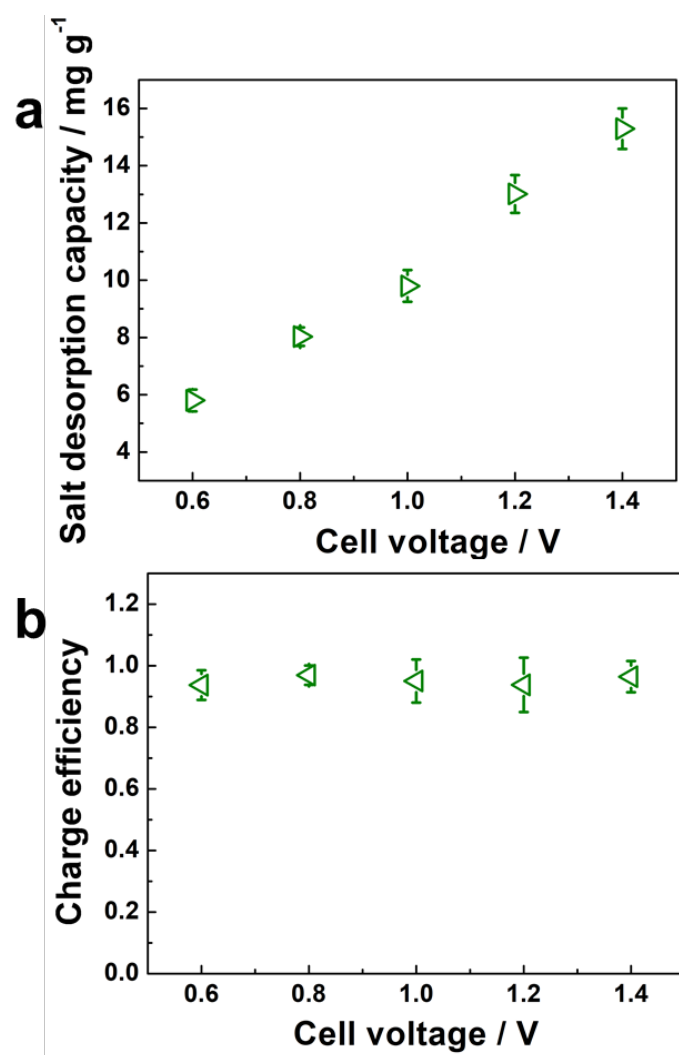

**Figure S4.** (a) Salt desorption capacity and (b) charge efficiency during the discharging process of  $\text{MnO}_2//\text{AC-QPVP}$  at different cell voltages in 500 mg/L NaCl.

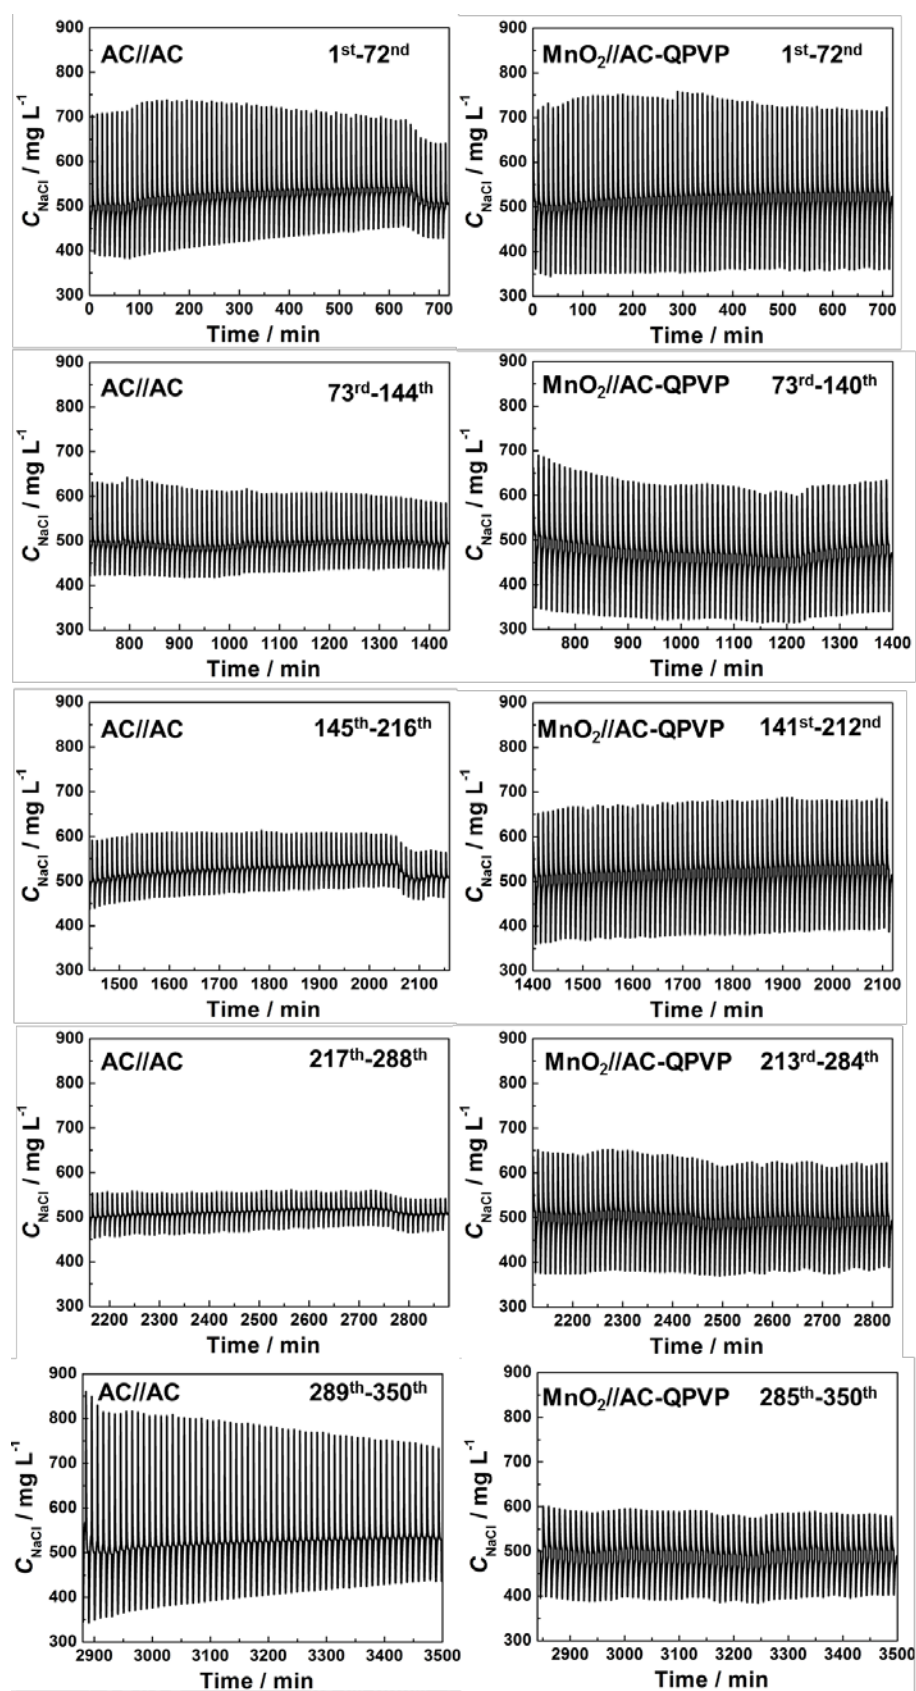

**Figure S5.** Effluent NaCl concentration profiles of AC//AC and  $MnO_2$ //AC-QPVP during the cyclic tests.

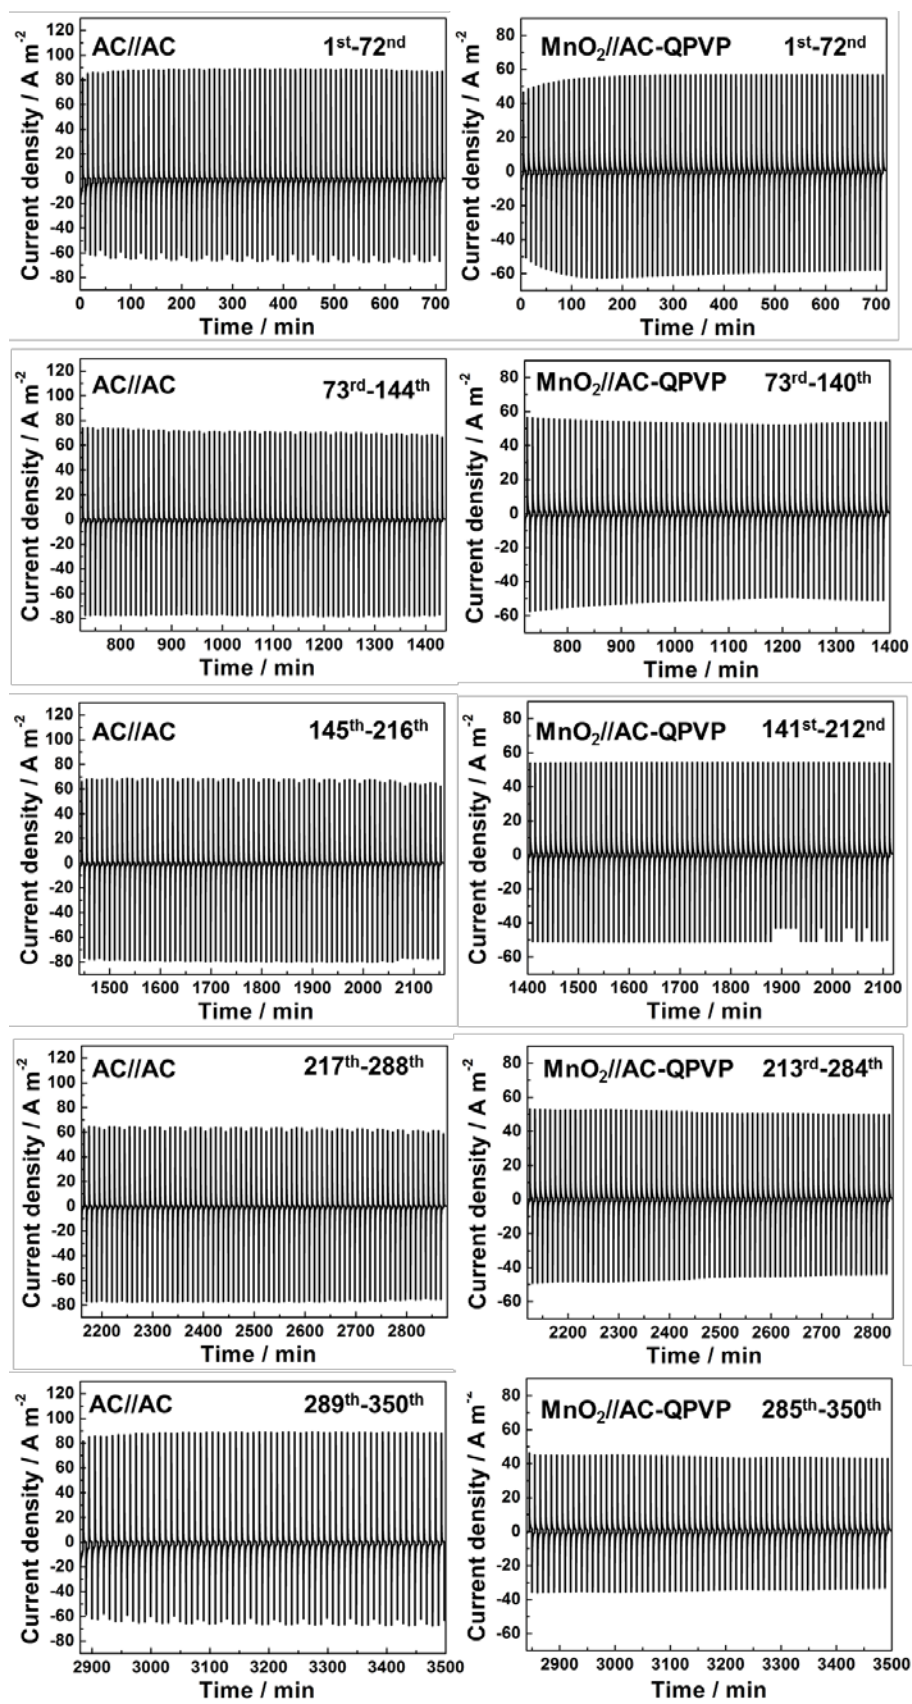

**Figure S6.** Current density of AC//AC and MnO<sub>2</sub>//AC-QPVP during the cyclic tests.

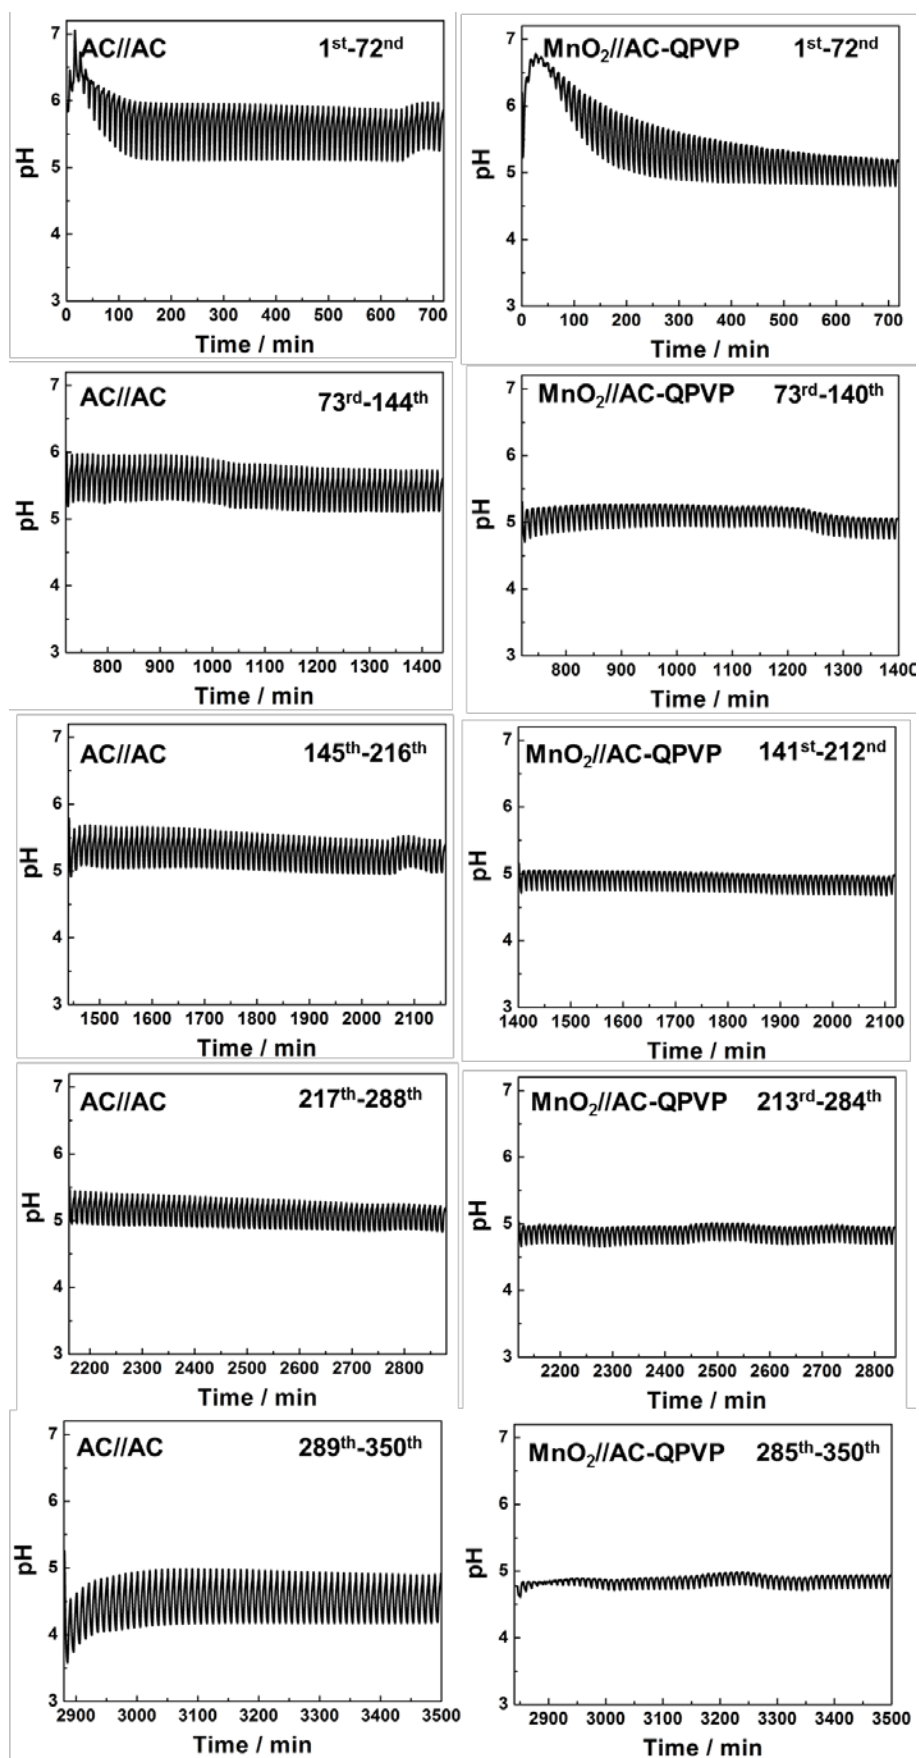

**Figure S7.** Effluent pH changes of AC//AC and MnO<sub>2</sub>//AC-QPVP during the cyclic tests.



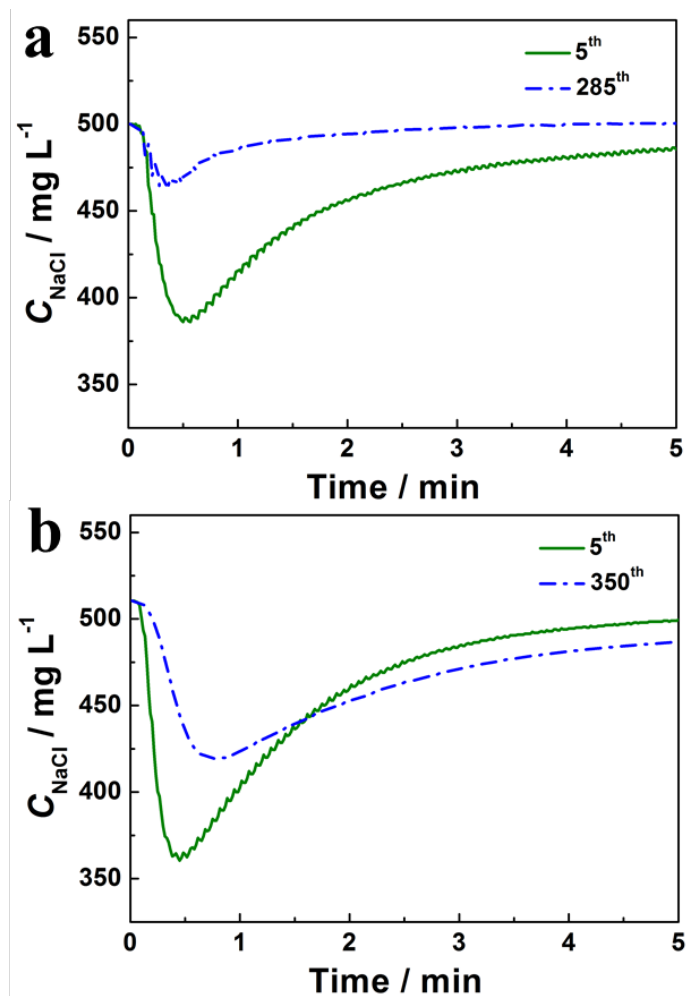

**Figure S8.** Effluent NaCl concentration profiles of (a) AC//AC and (b) MnO<sub>2</sub>//AC-QPVP during the adsorption processes at the initial stage and the end of the cyclic test.

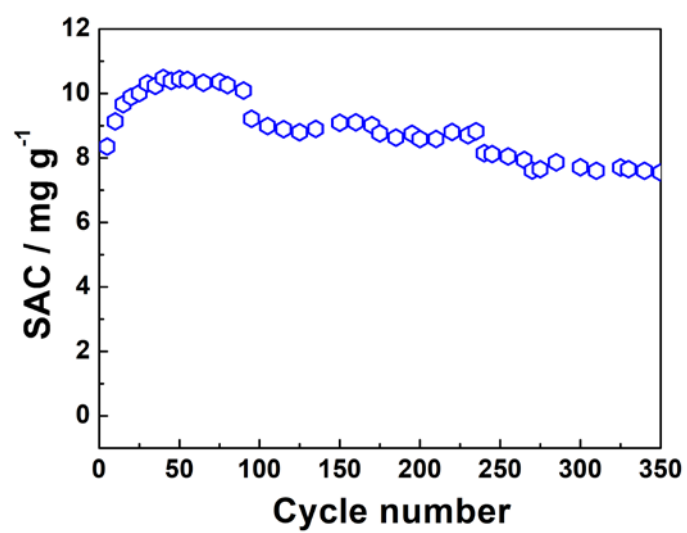

**Figure S9.** Changes in the SAC of another MnO<sub>2</sub>//AC-QPVP cell during the cyclic test.
